# Supplementary material for: A Cu(i)–I coordination polymer fluorescent chemosensor with amino-rich sites for nitro aromatic compound (NAC) detection in water
Source: Royal Society of Chemistry journal article supplement (doi:10.1039/d0ce00835d), 2020-01-01
Supplement: d0ce00835d1.pdf [file d0ce00835d1.pdf]

## Supplementary Materials

### One Cu(I)-I coordination polymer fluorescent chemosensor with amino-rich sites for Nitro aromatic compounds (NACs) detection in water

Yu Zhang <sup>a</sup>, Qingfeng Yang <sup>b</sup>, Xiaoping Li <sup>c</sup>, Chengxia Miao <sup>a</sup>, Qin Hou<sup>\*,a</sup>, Shiyun Ai<sup>\*,a</sup>

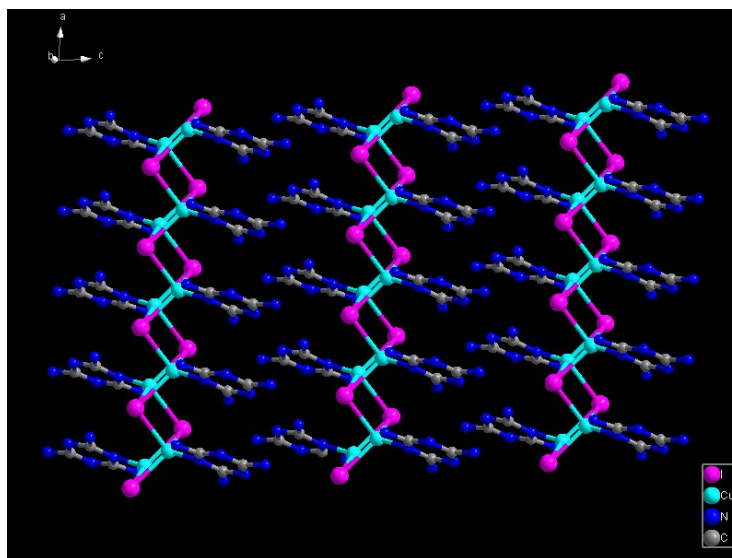

**Fig. S1.** The stacking graphic of compound 1 in *ac* plane.

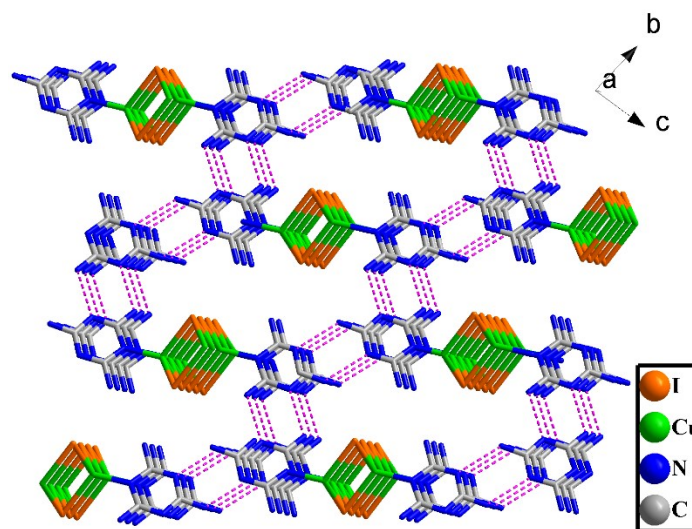

**Fig. S2.** The 3-D supramolecular architecture of compound 1 in *bc* plane by N (6) -H

(6A)...N (3)#1, N (5) -H (5A)...N (2)#2 H-bonds. Symmetry code: #1 -x, 1-y, 2-z, #2 1-x, 2-y, 2-z.

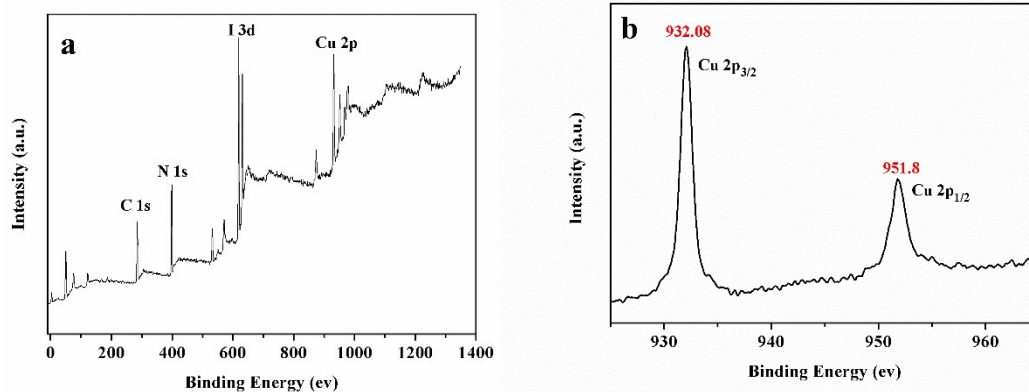

**Fig. S3.** XPS spectra of compound 1. (a) survey of 1, (b) Cu 2p.

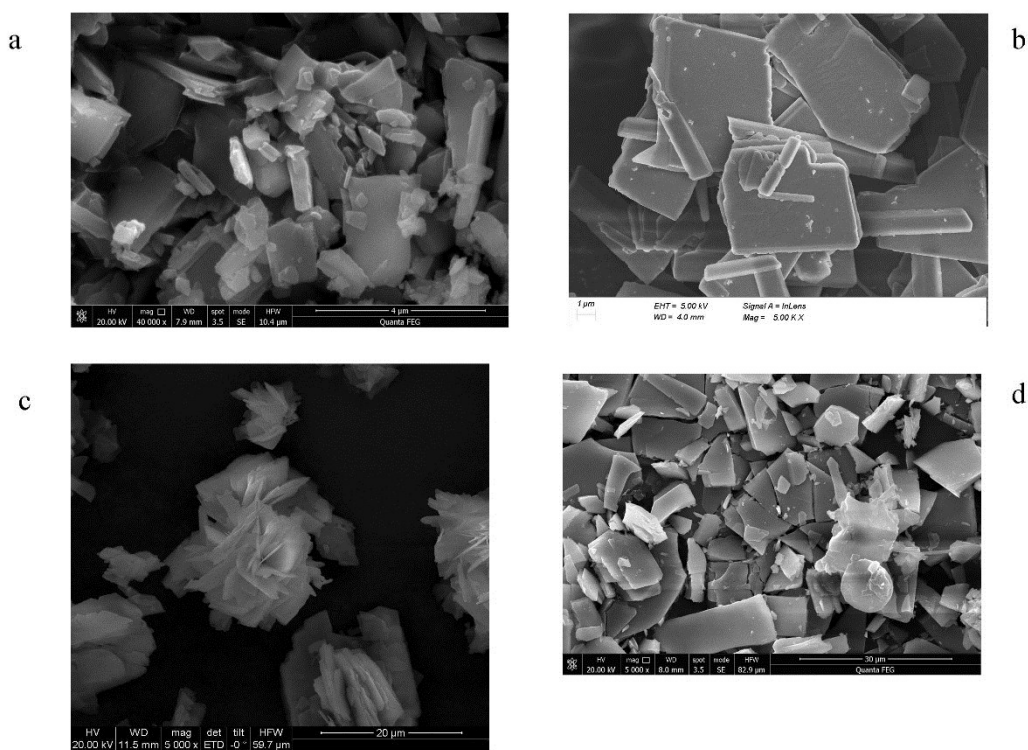

**Fig. S4.** SEM images nanosheet or nanorod of 1 with different length (~ 2 um for a; ~ 5 um for b; ~ 10 um for c; ~ 15 um for d) and morphologies.

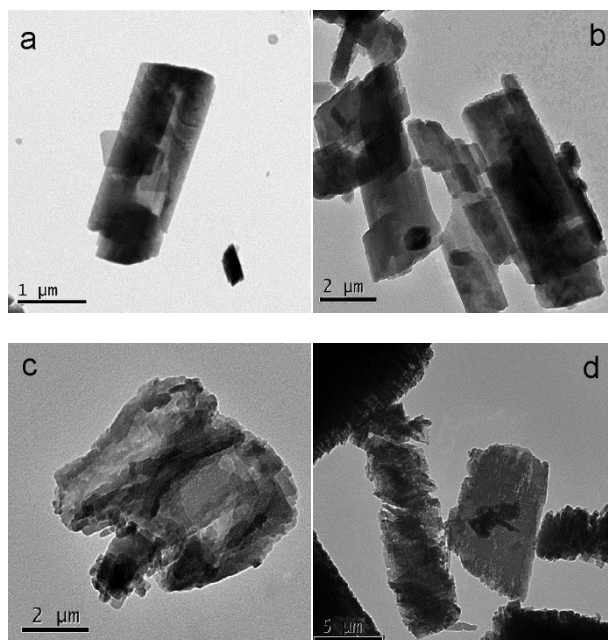

**Fig. S5.** TEM images nanosheet or nanorod of **1** with different length ( $\sim 2$   $\mu\text{m}$  for a;  $\sim 5$   $\mu\text{m}$  for b;  $\sim 10$   $\mu\text{m}$  for c;  $\sim 15$   $\mu\text{m}$  for d)

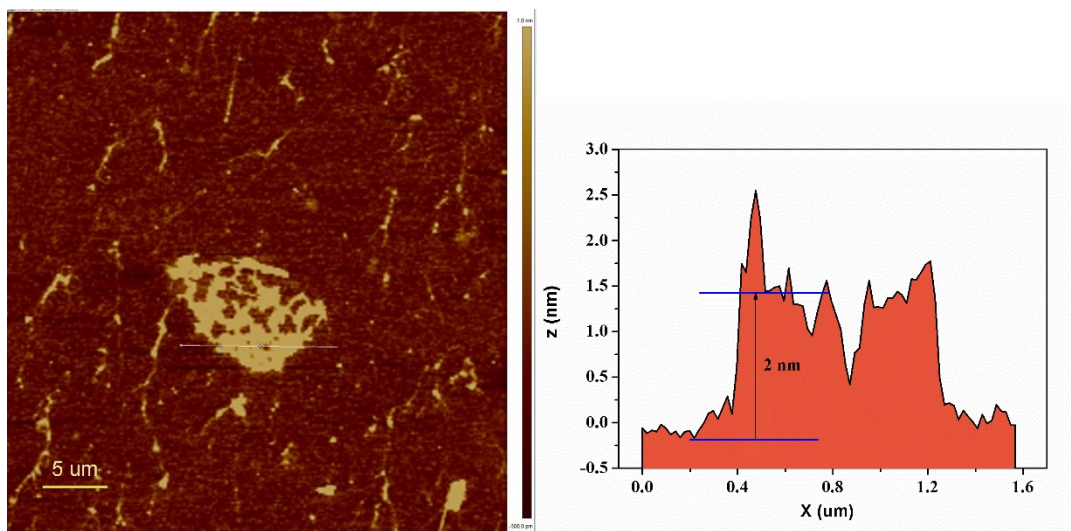

**Fig. S6.** AFM image of **1** with the length about 10  $\mu\text{m}$  and corresponding height profile diagram for the nanosheet.

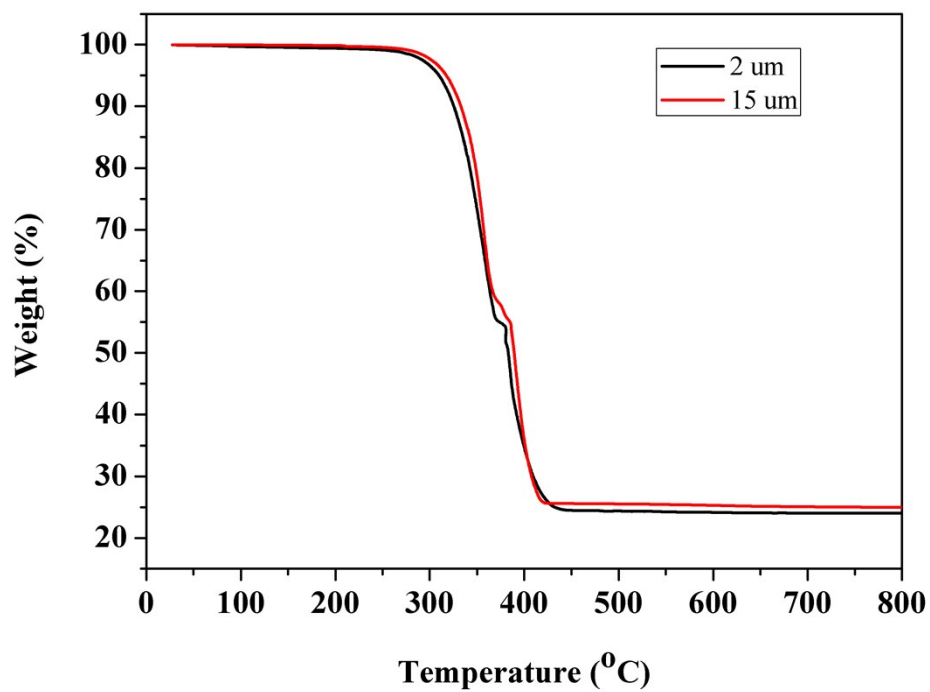

**Fig. S7.** Thermogravimetric analysis plot for compound **1** with the length of nanosheet (nanorod) about 2 μm and 15 μm.

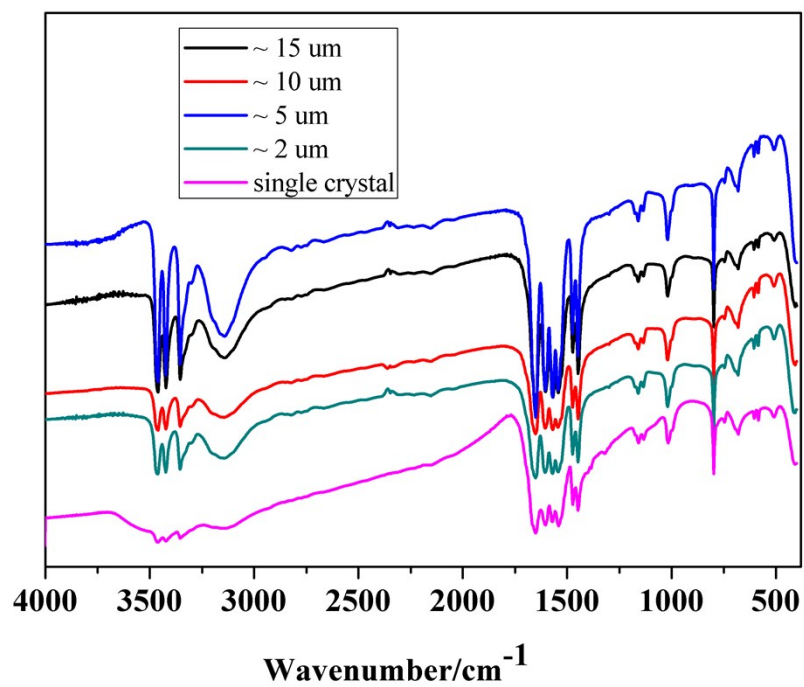

**Fig. S8.** The IR spectra of compound **1** with single crystal and other different sizes at room temperature.

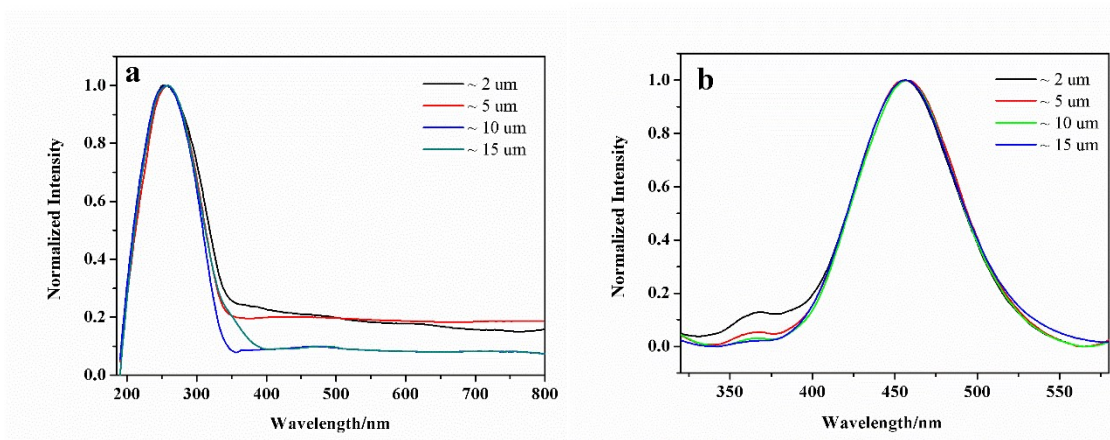

**Fig. S9.** The solid-state UV-vis spectra (a) and fluorescence emission spectra (b) of compound **1** with different sizes.

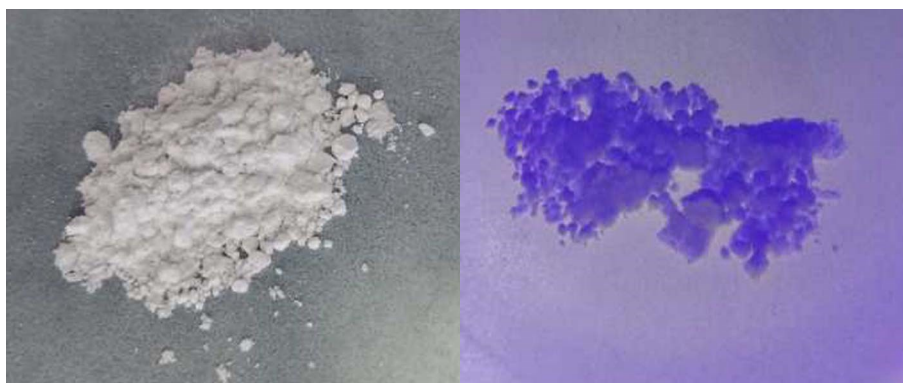

**Fig. S10.** The photograph of compound **1** before and after under irradiation with a UV-vis light at 365 nm.

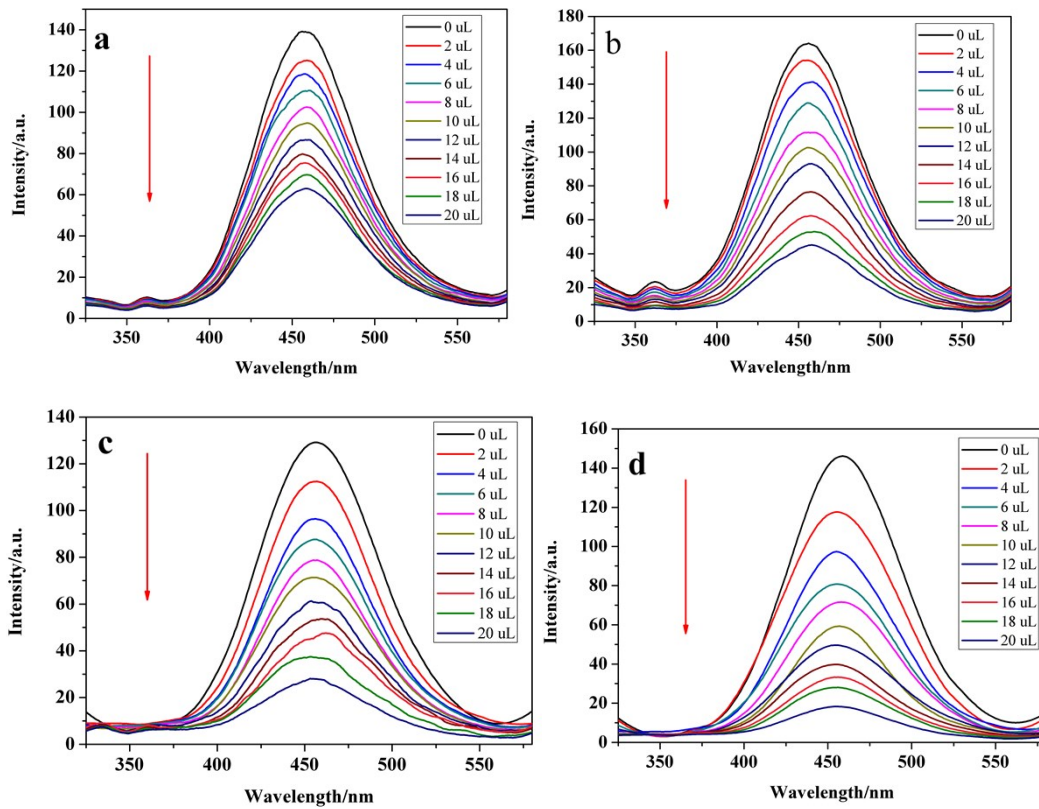

**Fig. S11.** The emission spectra for different nano scale **1** after addition of TNP (a) ~ 15 μm; (b) ~ 10 μm; (c) ~ 5 μm; (d) ~ 2 μm.

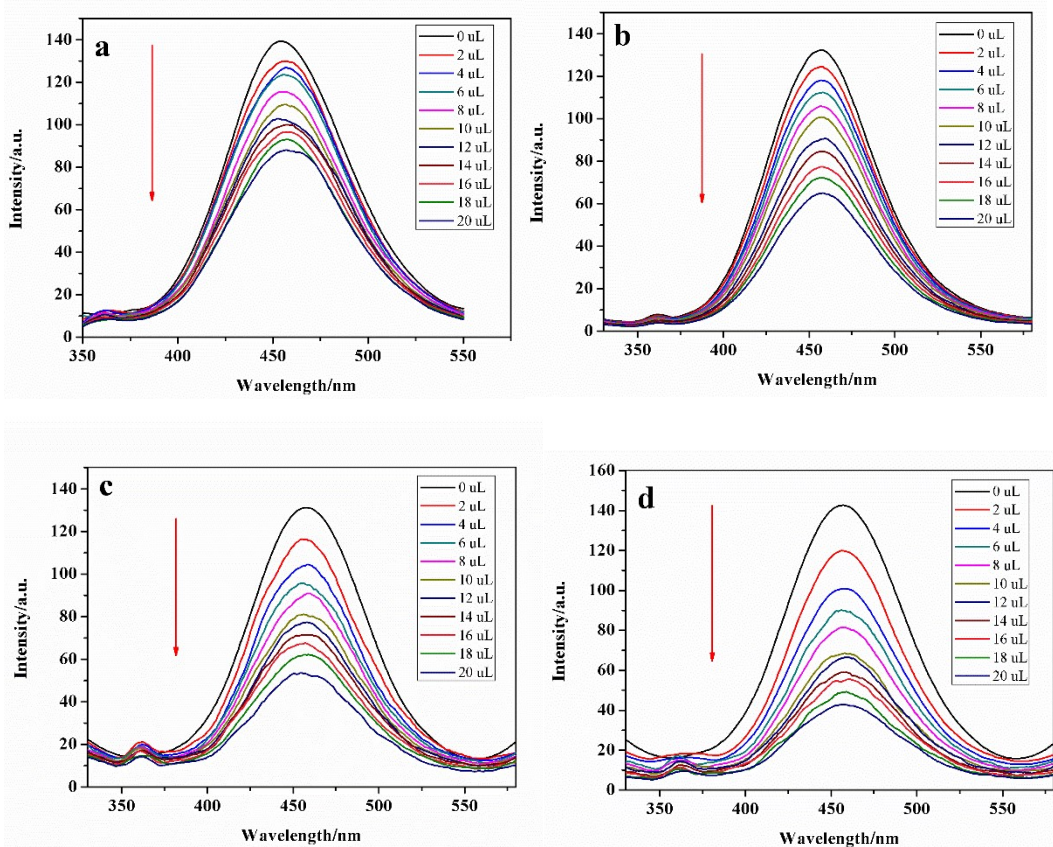

**Fig. S12.** The emission spectra for different nano scale 1 after addition of 2,4-DNP (a) ~ 15  $\mu\text{m}$ ; (b) ~ 10  $\mu\text{m}$ ; (c) ~ 5  $\mu\text{m}$ ; (d) ~ 2  $\mu\text{m}$ .

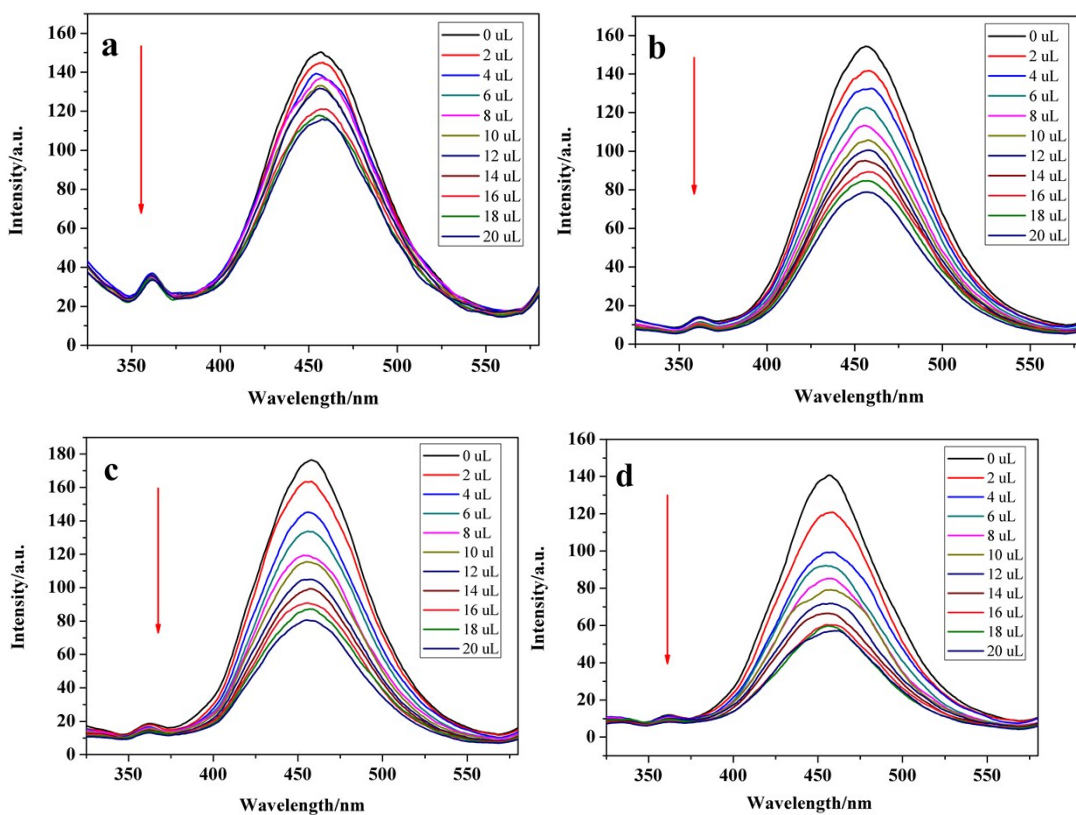

**Fig. S13.** The emission spectra for different nano scale 1 after addition of 2, 4-DNT (a) ~ 15  $\mu\text{m}$ ; (b) ~ 10  $\mu\text{m}$ ; (c) ~ 5  $\mu\text{m}$ ; (d) ~ 2  $\mu\text{m}$ .



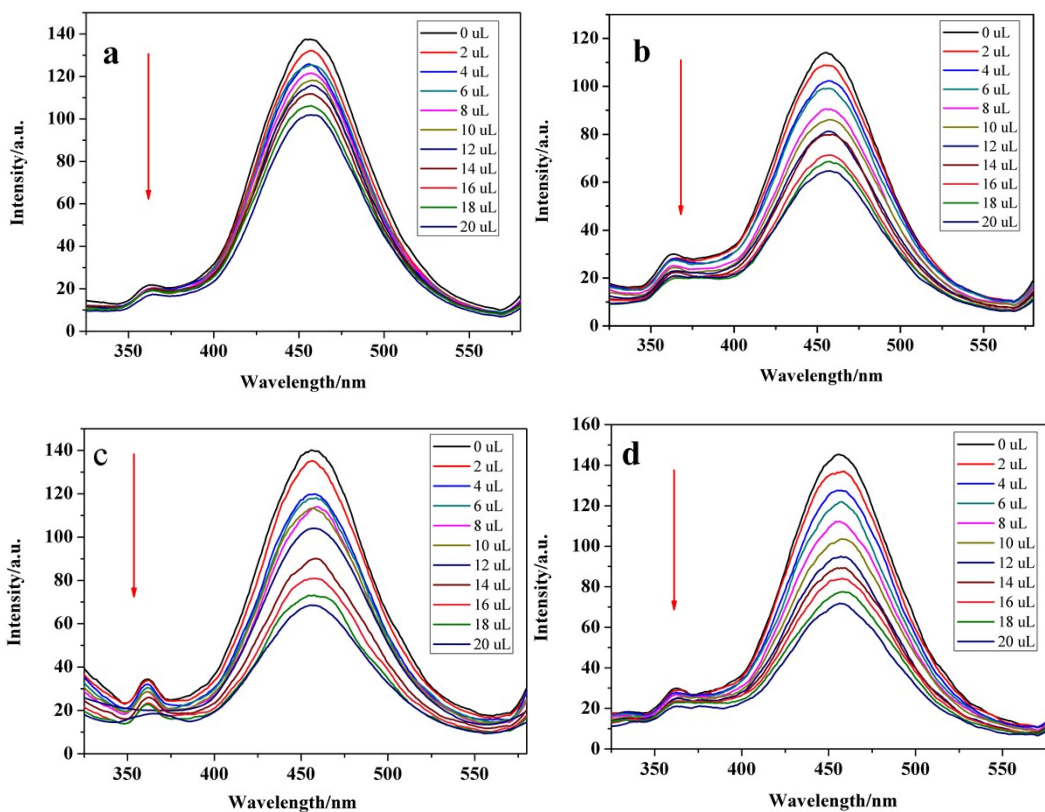

**Fig. S14.** The emission spectra for different nano scale **1** after addition of 4-NP (a) ~ 15  $\mu\text{m}$ ; (b) ~ 10  $\mu\text{m}$ ; (c) ~ 5  $\mu\text{m}$ ; (d) ~ 2  $\mu\text{m}$ .

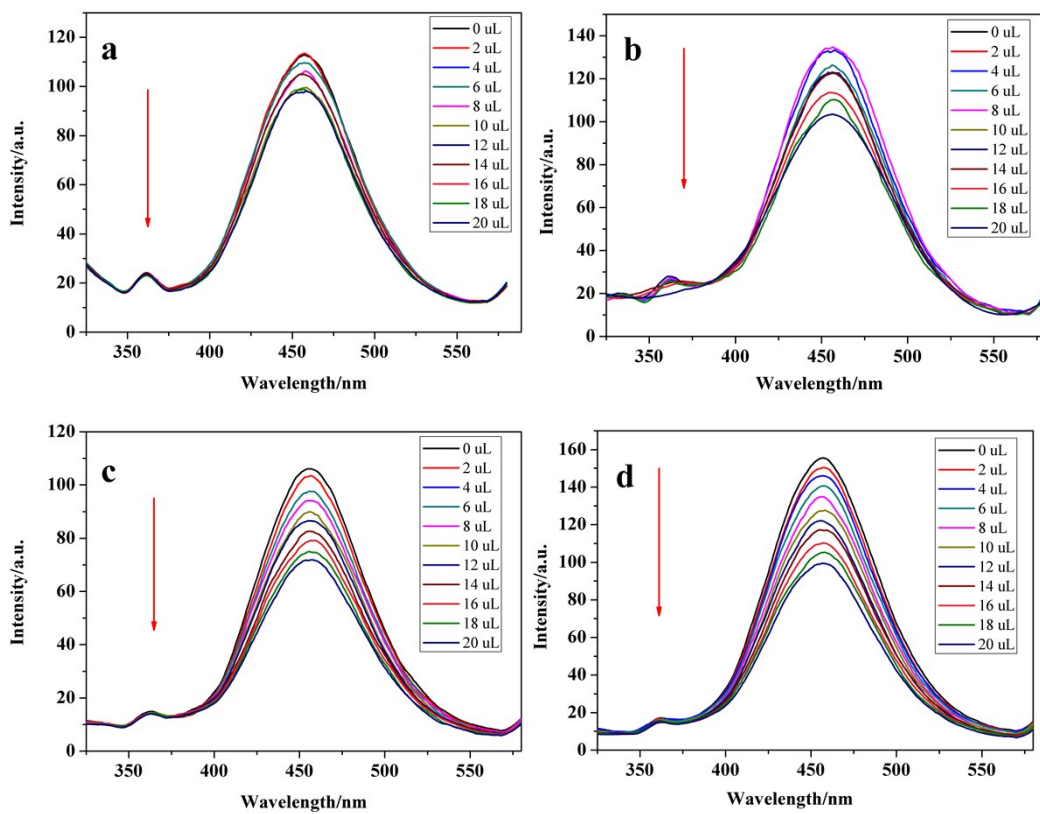

**Fig. S15.** The emission spectra for different nano scale **1** after addition of NB (a) ~ 15 μm; (b) ~ 10 μm; (c) ~ 5 μm; (d) ~ 2 μm.

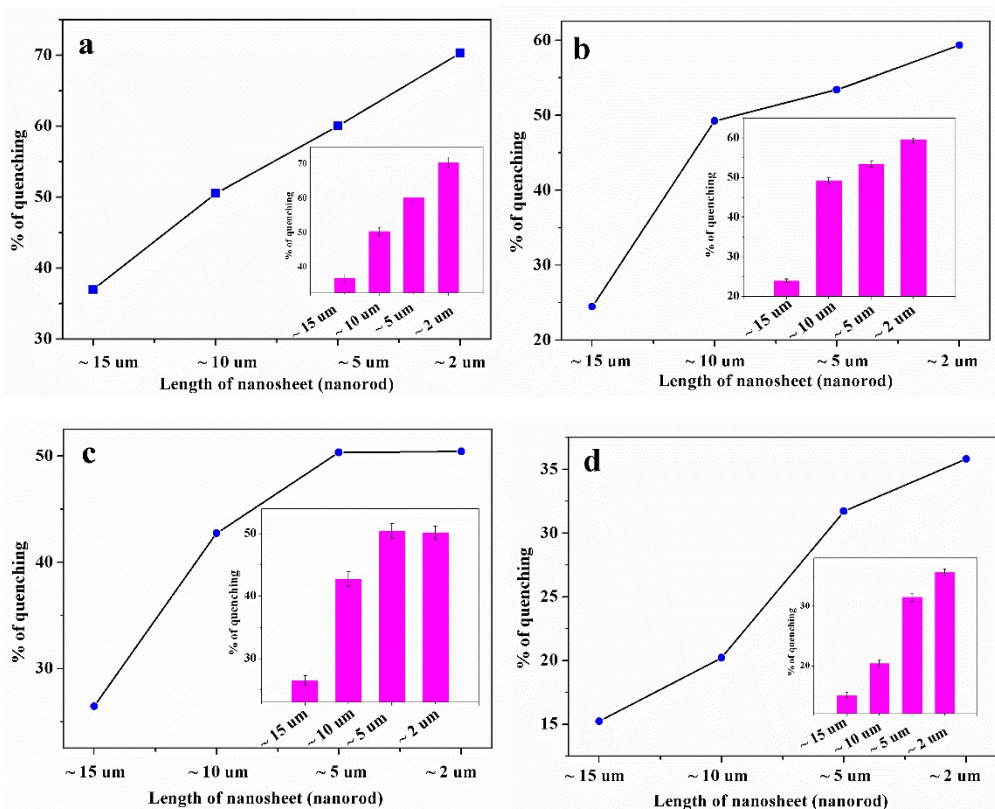

**Fig. S16.** The plot of quenching efficiency of **1** to 2,4-DNP (a); 2,4-DNT (b); 4-NP (c); NB (d) with different sizes. Inset: the percentage of enhancement of the fluorescence quenching with respect to particle sizes.

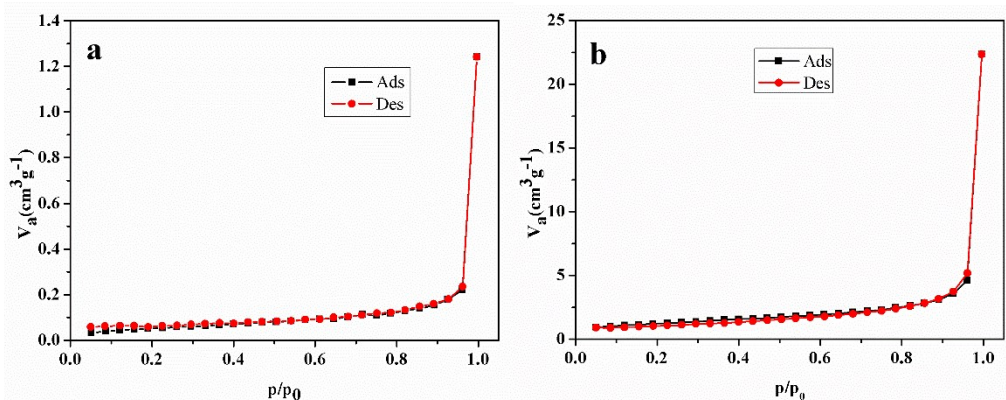

**Fig. S17.** Adsorption isotherm of  $N_2$  for  $\sim 15$   $\mu\text{m}$  sample (a) and  $\sim 2$   $\mu\text{m}$  sample. The BET surface area for both samples are  $0.198 \text{ m}^2\text{g}^{-1}$  and  $4.249 \text{ m}^2\text{g}^{-1}$ , respectively.

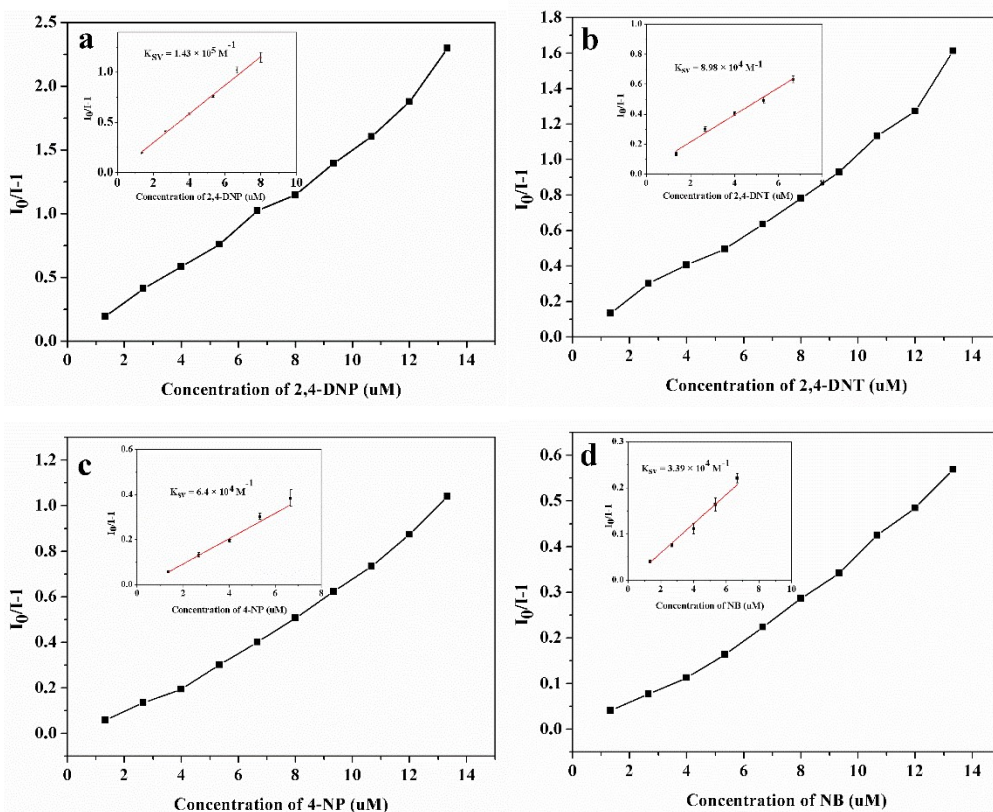

**Fig. S18.** The SV plot of 2,4-DNP (a); 2,4-DNT (b); 4-NP (c); NB (d) in water suspension of **1**. Insets: linear fitting within the lower concentration region with  $R^2 = 0.994, 0.984, 0.985, 0.979$  for 2,4-DNP, 2,4-DNT, 4-NP and NB, respectively.

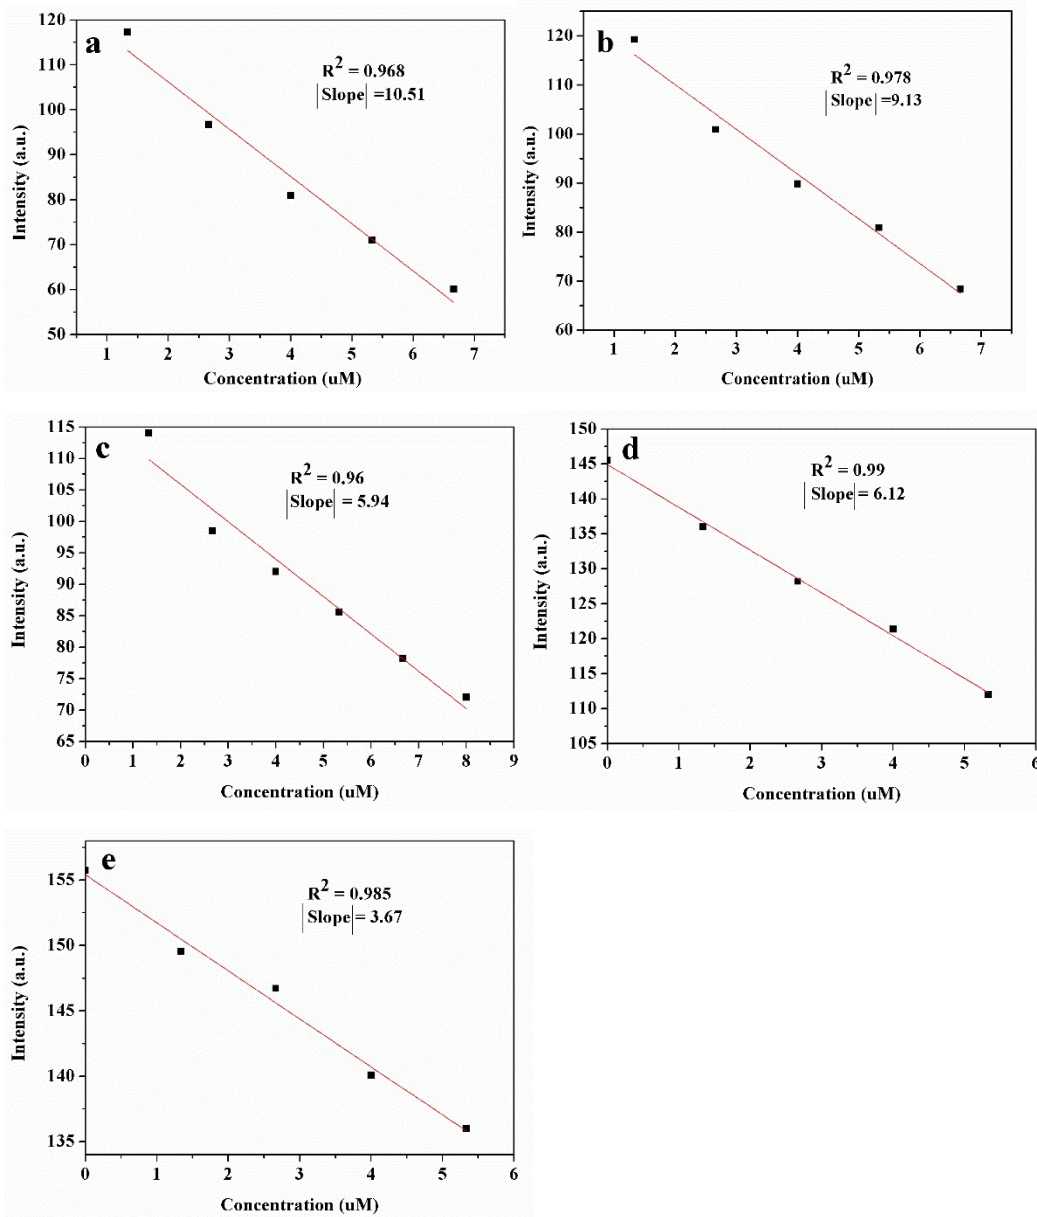

**Fig. S19.** The intensity vs. concentration plot for TNP (a), 2,4-DNP (b), 2,4-DNT (c), 4-NP (d) and NB (e).

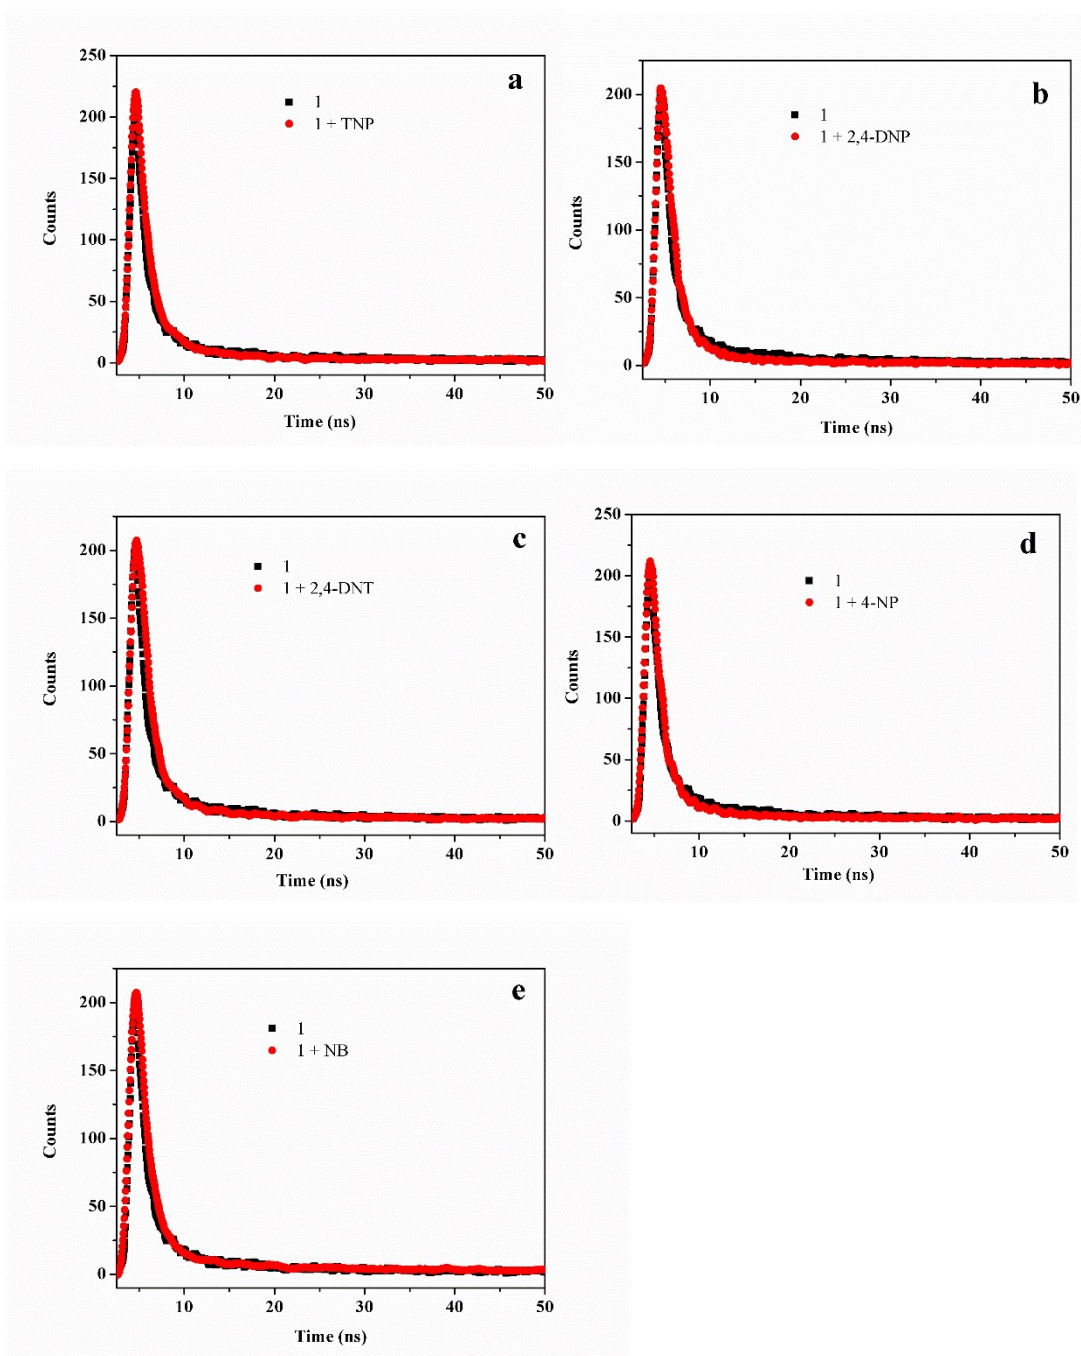

**Fig. S20.** The fluorescence lifetime of **1** before and after addition of TNP (a); 2,4-DNP (b); 2,4-DNT (c); 4-NP (d); NB (e) (12  $\mu$ L, 10 mM).

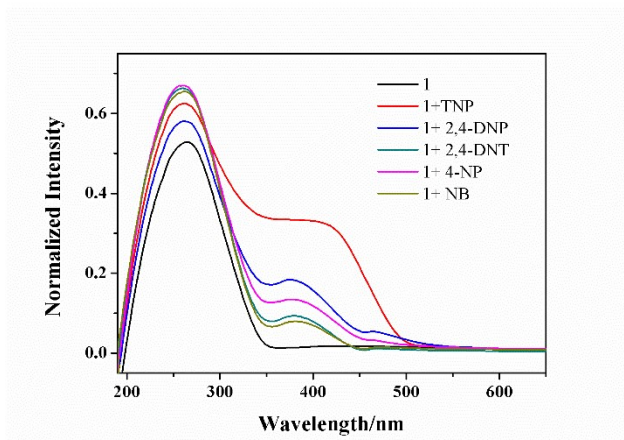

**Fig. S21.** The solid-state UV-vis spectra of compound **1** and after **1** immersed in NACs.

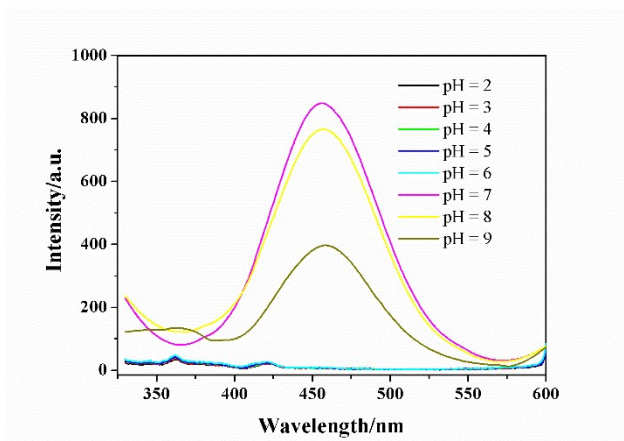

**Fig. S22.** The effect of pH on the fluorescence emission spectra of compound **1**.

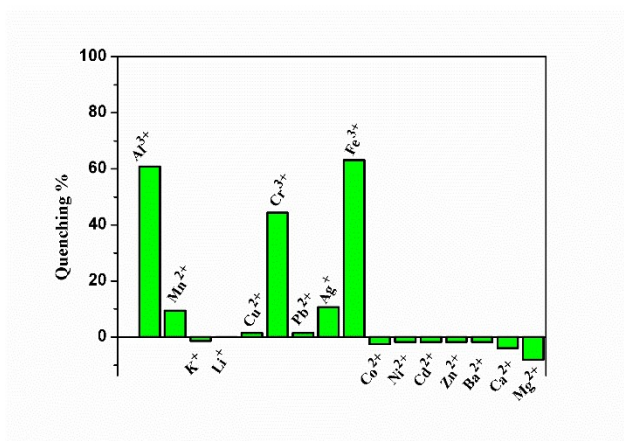

**Fig. S23.** The fluorescence quenching efficiency of compound **1** by addition of various metal ions (0.025 M).

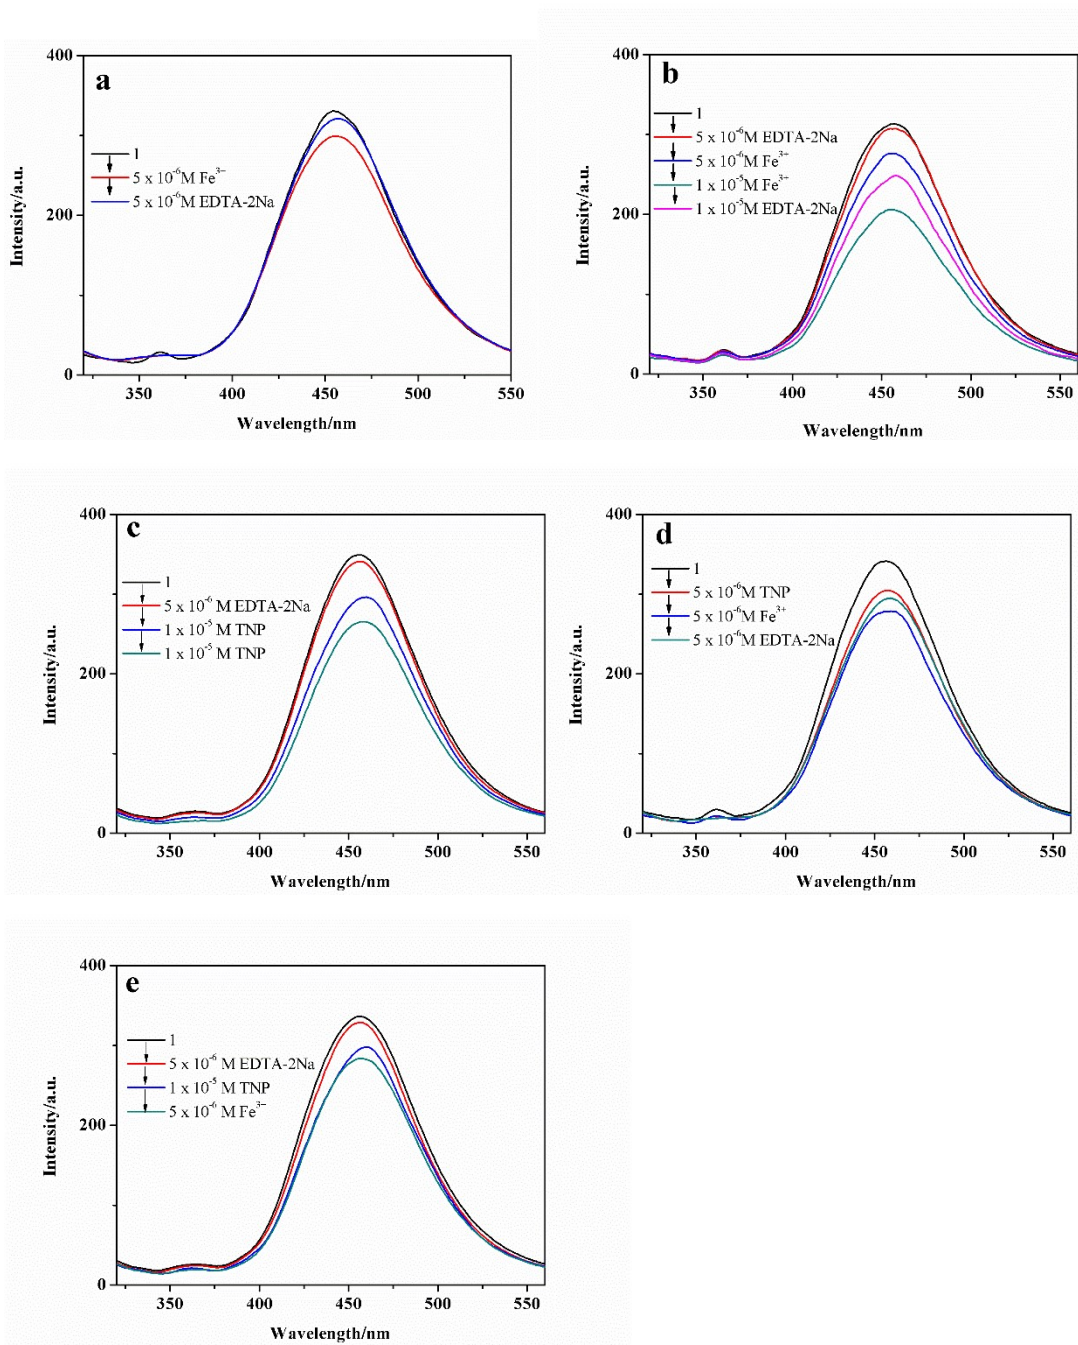

**Fig. S24.** The change of fluorescence intensity of compound **1** by addition of  $\text{Fe}^{3+}$  ions before and after addition of EDTA-2Na ((a) and (b)) and the detection of TNP in presence of masking agent (c), (d) and (e).



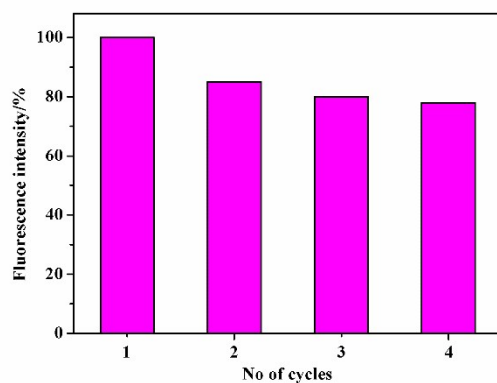

**Fig. S25.** The changes of emission intensity of **1** after four recycles detection of TNP.

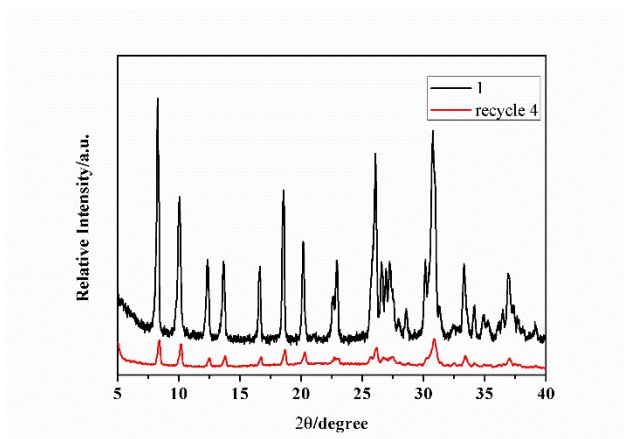

**Fig. S26.** The PXRD patterns of compound **1** and after four recycles detection of TNP.

**Table S1:** Synthetic conditions for different sizes of nano scale of **1**.

| Size    | CuI (mmol) | MA (mmol) | DMF-H <sub>2</sub> O (V:<br>V = 1:2) (mL) | EtOH-H <sub>2</sub> O (V:<br>V = 1:1) (mL) |
|---------|------------|-----------|-------------------------------------------|--------------------------------------------|
| ~ 15 um | 1          | 1         | 0                                         | 16                                         |
| ~ 10 um | 1          | 1         | 21                                        | 0                                          |
| ~ 5 um  | 1          | 1         | 30                                        | 0                                          |
| ~ 2 um  | 1          | 1         | 0                                         | 40                                         |

**Table S2:** Crystallographic data for **1**.

|                                                                                                                                              |                                                                                            |
|----------------------------------------------------------------------------------------------------------------------------------------------|--------------------------------------------------------------------------------------------|
| Empirical formula                                                                                                                            | C <sub>6</sub> H <sub>12</sub> N <sub>12</sub> I <sub>2</sub> Cu <sub>2</sub> ( <b>1</b> ) |
| Formula weight                                                                                                                               | 633.16                                                                                     |
| Space group                                                                                                                                  | triclinic                                                                                  |
| <i>a</i> /Å                                                                                                                                  | 4.0787(3)                                                                                  |
| <i>b</i> /Å                                                                                                                                  | 9.0943(6)                                                                                  |
| <i>c</i> /Å                                                                                                                                  | 10.9148(7)                                                                                 |
| <i>V</i> /Å <sup>3</sup>                                                                                                                     | 387.69(5)                                                                                  |
| <i>Z</i>                                                                                                                                     | 1                                                                                          |
| <i>D</i> <sub>c</sub> /Mg mm <sup>-3</sup>                                                                                                   | 2.712                                                                                      |
| <i>μ</i> /mm <sup>-1</sup>                                                                                                                   | 6.740                                                                                      |
| <i>F</i> (000)                                                                                                                               | 296                                                                                        |
| Radiation                                                                                                                                    | MoKα (λ = 0.71073)                                                                         |
| Reflections collected                                                                                                                        | 2914                                                                                       |
| Independent reflections                                                                                                                      | 1390 [R <sub>int</sub> = 0.0332, R <sub>sigma</sub> = 0.0486]                              |
| Data/restraints/parameters                                                                                                                   | 1390/0/103                                                                                 |
| Goodness-of-fit on F <sup>2</sup>                                                                                                            | 1.044                                                                                      |
| Final R indexes [I ≥ 2σ (I)]                                                                                                                 | R <sub>1</sub> <sup>a</sup> = 0.0259, wR <sub>2</sub> <sup>b</sup> = 0.0492                |
| Final R indexes [all data]                                                                                                                   | R <sub>1</sub> = 0.0299, wR <sub>2</sub> = 0.0521                                          |
| <sup>a</sup> $R_1 = \frac{\sum   F_o  -  F_c  }{\sum  F_o }$ . <sup>b</sup> $wR^2 = \frac{ \sum w( F_o ^2 -  F_c ^2) }{\sum w(F_o^2)^{1/2}}$ |                                                                                            |

**Table S3:** Selected bond lengths and bond angles in compound **1**.

|                  | Bond lengths<br>(Å) |                           | Bond angles<br>(degree) |
|------------------|---------------------|---------------------------|-------------------------|
| Cu (1)-I (1)     | 2.6412(7)           | I (1)-Cu (1)-I (1) #1     | 97.765(2)               |
| Cu (1)-I (1) #1  | 2.7716(8)           | I (1)-Cu (1)-I (1) #2     | 115.465(2)              |
| Cu (1)-I (1) #2  | 2.7180(7)           | I (1) #1-Cu (1)-I (1) #2  | 92.969(2)               |
| Cu (1)-N (1)     | 2.018(4)            | Cu (1) #4-I (1)-Cu (1) #1 | 87.031(2)               |
| Cu (1)-Cu (1) #2 | 2.8619(12)          |                           |                         |
| Cu (1)-Cu (1) #3 | 3.7801(3)           |                           |                         |

Symmetry transformations used to generate equivalent atoms:

#1 1+x, y, z #2 1-x, 1-y, 1-z #3 2-x, 1-y, 1-z #4 x-1, y, z

### Calculation of Quantum Yield ( $\Phi$ )

Quinine sulfate solution (dissolved in 0.5 M H<sub>2</sub>SO<sub>4</sub>) was taken as the reference for the calculation of the fluorescence quantum yield.

Quantum Yield ( $\Phi$ ) =  $\Phi_R \cdot I \cdot A_R \cdot \eta^2 / I_R \cdot A \cdot \eta_R^2$  (Subscript R is representing the reference Quinine Sulfate)

$\Phi_R = \Phi_{\text{emi}} = 0.546$ ,  $\lambda_{\text{emi}} = 340$  nm

A = Optical density.

I = Integrated emission intensity.

$\eta$  = Refractive index. For H<sub>2</sub>O  $\eta = 1.333$ .

All of the photo-physical experiments were carried out in the same experimental condition.

**Table S4:** Data chart for the Quantum Yield of **1**.

| Solution under experiment                              | Integrated emission intensity (I) | Optical density (A) | Quantum yield ( $\Phi$ ) |
|--------------------------------------------------------|-----------------------------------|---------------------|--------------------------|
| Quinine sulfate in 0.5M H <sub>2</sub> SO <sub>4</sub> | 80352                             | 0.0105              | 0.5460                   |
| <b>1</b>                                               | 8082                              | 0.033               | 0.0173                   |

### Limit of detection (LOD) calculation

The limit of detection of TNP, 2,4-DNP, 2,4-DNT, 4-NP and NB was calculated using the conventional formula:

$$\text{LOD} = 3\sigma/\text{slope}$$

Where, the standard deviation ( $\sigma$ ) was calculated via the measurement of six successive fluorescence intensity of compound **1** with the nano length of 2  $\mu\text{m}$  in absence of NACs (under the same condition). The slope obtained by plotting the emission intensity of compound **1** against the concentration of NACs added.

**Table S5:** Standard deviation calculation

| Blank                           | Fluorescence intensity |
|---------------------------------|------------------------|
| #1                              | 315.3933               |
| #2                              | 315.0562               |
| #3                              | 315.0457               |
| #4                              | 312.3596               |
| #5                              | 309.6292               |
| #6                              | 310.618                |
| Standard deviation ( $\sigma$ ) | 2.5134                 |

**Table S6:** LOD calculation.

| NACs    | $\sigma$ | slope | LOD                 |
|---------|----------|-------|---------------------|
| TNP     | 2.5134   | 10.51 | 0.717 $\mu\text{M}$ |
| 2,4-DNP | 2.5134   | 9.13  | 0.826 $\mu\text{M}$ |
| 2,4-DNT | 2.5134   | 5.94  | 1.269 $\mu\text{M}$ |
| 4-NP    | 2.5134   | 6.12  | 1.232 $\mu\text{M}$ |
| NB      | 2.5134   | 3.67  | 2.055 $\mu\text{M}$ |

**Table S7:** Comparison of different fluorescent materials used for sensing TNP.

| Materials                                                                                                           | Media | Analyte | $K_{sv}$ ( $M^{-1}$ ) | sensors                                | Ref.      |
|---------------------------------------------------------------------------------------------------------------------|-------|---------|-----------------------|----------------------------------------|-----------|
| <b>1</b>                                                                                                            | water | TNP     | $2.2 \times 10^5$     | $0.03 \text{ mg} \cdot \text{mL}^{-1}$ | This work |
| $\{\text{Zn}_2(\text{tpt})_2(\text{tad})_2 \cdot \text{H}_2\text{O}\}$                                              | water | TNP     | $7.8 \times 10^4$     | $0.08 \text{ mg} \cdot \text{mL}^{-1}$ | 15        |
| $[\text{Zn}_8(\text{ad})_4(\text{BPDC})_6\text{O} \cdot 2 \text{Me}_2\text{NH}_2] \cdot \text{G}$ (G=DMF and water) | water | TNP     | $4.6 \times 10^4$     | $0.5 \text{ mg} \cdot \text{mL}^{-1}$  | 16        |
| 5-((4,6-diamino-1,3,5-triazin-2-yl) amino) isoph-thalic acid ( $\text{H}_2$ ATAIA)                                  | water | TNP     | $1.759 \times 10^5$   | $0.5 \text{ mg} \cdot \text{mL}^{-1}$  | 17        |
| $[\text{NH}_2(\text{CH}_3)_2][\text{Zn}_4\text{O}(\text{bpt})_2(\text{bdc})_{0.5}] \cdot 5\text{DMF}$               | DMF   | TNP     | $1.69 \times 10^4$    | $1 \text{ mg} \cdot \text{mL}^{-1}$    | 39        |
